# Supplementary material for: Application of Metabolomics to Identify Hepatic Biomarkers of Foie Gras Qualities in Duck
Source: Frontiers journal article supplement (doi:10.3389/fphys.2021.694809), 2021-07-07
Supplement: Table_2.XLSX [file Table_2.XLSX]

## Sheet: Sup_2_VIP List_Liver_Bucket_TY_
Bucket identity	Chemical shift (ppm)	VIPε	Supplemental data 1: VIP-values of the first latent variable in the PLS score plot for the technological yield analysis with the bucket method.
B1328	1.328	11.68
B1339	1.339	11.14
B3427	3.427	5.44	ε VIP-value of the first latent variable of the PLS model
B3832	3.832	4.72
B3229	3.229	4.43
B3504	3.504	4.28
B3909	3.909	3.98
B3887	3.887	3.97
B3722	3.722	3.89
B3854	3.854	3.76
B3416	3.416	3.70
B3733	3.733	3.48
B3471	3.471	3.38
B148	1.48	3.34
B5239	5.239	3.31
B3438	3.438	3.27
B3766	3.766	3.06
B3744	3.744	3.04
B3482	3.482	3.03
B1491	1.491	2.83
B3843	3.843	2.81
B346	3.46	2.56
B525	5.25	2.55
B3262	3.262	2.52
B4107	4.107	2.41
B3041	3.041	2.39
B3515	3.515	2.27
B3284	3.284	2.14
B4118	4.118	2.08
B5416	5.416	2.02
B4096	4.096	1.91
B3711	3.711	1.90
B3394	3.394	1.88
B3405	3.405	1.85
B3777	3.777	1.75
B4074	4.074	1.74
B3273	3.273	1.73
B3755	3.755	1.67
B3493	3.493	1.58
B3931	3.931	1.54
B2361	2.361	1.51
B3647	3.647	1.46
B3251	3.251	1.45
B5405	5.405	1.42
B3821	3.821	1.33
B2174	2.174	1.31
B3207	3.207	1.31
B3657	3.657	1.26
B235	2.35	1.26
B3559	3.559	1.25
B2372	2.372	1.25
B357	3.57	1.21
B3581	3.581	1.21
B3689	3.689	1.14
B3548	3.548	1.14
B2163	2.163	1.13
B2546	2.546	1.12
B3537	3.537	1.12
B1218	1.218	1.09
B2557	2.557	1.06
B2405	2.405	1.06
B3964	3.964	1.04
B4129	4.129	1.03
B2667	2.667	1.02
B4008	4.008	0.99
B2689	2.689	0.98
B2383	2.383	0.98
B1229	1.229	0.97
B3986	3.986	0.95
B4173	4.173	0.95
B3328	3.328	0.92
B2339	2.339	0.91
B3306	3.306	0.91
B8272	8.272	0.90
B2986	2.986	0.90
B3636	3.636	0.89
B3788	3.788	0.88
B2185	2.185	0.85
B4184	4.184	0.85
B2964	2.964	0.83
B3614	3.614	0.82
B3975	3.975	0.81
B8283	8.283	0.80
B2656	2.656	0.80
B7955	7.955	0.79
B2119	2.119	0.77
B3625	3.625	0.76
B1447	1.447	0.75
B2536	2.536	0.74
B3799	3.799	0.74
B37	3.7	0.73
B3052	3.052	0.72
B1207	1.207	0.70
B5471	5.471	0.70
B3085	3.085	0.69
B3865	3.865	0.69
B3876	3.876	0.69
B3119	3.119	0.67
B1788	1.788	0.66
B3096	3.096	0.66
B592	5.92	0.65
B2416	2.416	0.64
B0667	0.667	0.64
B6526	6.526	0.64
B3667	3.667	0.63
B0678	0.678	0.63
B3997	3.997	0.63
B1196	1.196	0.62
B213	2.13	0.62
B836	8.36	0.61
B303	3.03	0.60
B2568	2.568	0.60
B2075	2.075	0.60
B1174	1.174	0.57
B192	1.92	0.57
B1777	1.777	0.56
B3152	3.152	0.56
B1185	1.185	0.56
B3295	3.295	0.55
B1053	1.053	0.55
B1909	1.909	0.55
B313	3.13	0.54
B1284	1.284	0.54
B7889	7.889	0.54
B2504	2.504	0.54
B7878	7.878	0.53
B2053	2.053	0.52
B0943	0.943	0.51
B1163	1.163	0.51
B2152	2.152	0.50
B3603	3.603	0.50
B3141	3.141	0.49
B3942	3.942	0.49
B1436	1.436	0.49
B3074	3.074	0.48
B1152	1.152	0.48
B5427	5.427	0.48
B4317	4.317	0.48
B3898	3.898	0.47
B1042	1.042	0.46
B5931	5.931	0.46
B4019	4.019	0.46
B7162	7.162	0.46
B2042	2.042	0.45
B3174	3.174	0.45
B2086	2.086	0.44
B0744	0.744	0.44
B3163	3.163	0.44
B1931	1.931	0.44
B4295	4.295	0.43
B2097	2.097	0.43
B403	4.03	0.43
B1414	1.414	0.42
B4339	4.339	0.42
B0976	0.976	0.42
B135	1.35	0.42
B2526	2.526	0.41
B4449	4.449	0.41
B414	4.14	0.40
B5986	5.986	0.40
B2493	2.493	0.40
B8944	8.944	0.40
B3108	3.108	0.40
B4328	4.328	0.39
B3592	3.592	0.39
B4229	4.229	0.39
B4063	4.063	0.38
B825	8.25	0.38
B2394	2.394	0.38
B0855	0.855	0.37
B8065	8.065	0.37
B6085	6.085	0.37
B3008	3.008	0.37
B2997	2.997	0.37
B435	4.35	0.37
B2865	2.865	0.36
B3185	3.185	0.36
B2196	2.196	0.36
B2438	2.438	0.36
B2141	2.141	0.36
B3019	3.019	0.36
B5997	5.997	0.36
B2515	2.515	0.35
B6096	6.096	0.35
B1854	1.854	0.35
B1733	1.733	0.35
B381	3.81	0.35
B2108	2.108	0.35
B8712	8.712	0.34
B2975	2.975	0.33
B7602	7.602	0.33
B1865	1.865	0.33
B07	0.7	0.33
B159	1.59	0.33
B6129	6.129	0.33
B8735	8.735	0.33
B4195	4.195	0.33
B4085	4.085	0.33
B7173	7.173	0.32
B8558	8.558	0.32
B124	1.24	0.32
B2471	2.471	0.32
B4273	4.273	0.32
B7614	7.614	0.32
B8966	8.966	0.32
B1097	1.097	0.32
B6107	6.107	0.32
B4491	4.491	0.31
B8591	8.591	0.30
B1141	1.141	0.30
B1876	1.876	0.30
B0932	0.932	0.30
B7547	7.547	0.30
B1843	1.843	0.30
B1722	1.722	0.30
B091	0.91	0.29
B4471	4.471	0.29
B7206	7.206	0.29
B2887	2.887	0.29
B3953	3.953	0.28
B1108	1.108	0.28
B1755	1.755	0.28
B4438	4.438	0.28
B7327	7.327	0.28
B8723	8.723	0.28
B17	1.7	0.27
B1744	1.744	0.27
B2744	2.744	0.27
B0921	0.921	0.26
B5975	5.975	0.26
B1942	1.942	0.26
B591	5.91	0.26
B4383	4.383	0.25
B1273	1.273	0.25
B4041	4.041	0.25
B8261	8.261	0.24
B2482	2.482	0.24
B8184	8.184	0.24
B1799	1.799	0.24
B2449	2.449	0.24
B5327	5.327	0.24
B0711	0.711	0.24
B2645	2.645	0.24
B8076	8.076	0.24
B2601	2.601	0.24
B4394	4.394	0.23
B7338	7.338	0.23
B7944	7.944	0.23
B7558	7.558	0.23
B8547	8.547	0.23
B1425	1.425	0.23
B2427	2.427	0.23
B5108	5.108	0.23
B4151	4.151	0.23
B5504	5.504	0.23
B2898	2.898	0.22
B7966	7.966	0.22
B1898	1.898	0.22
B5603	5.603	0.22
B392	3.92	0.22
B3526	3.526	0.22
B614	6.14	0.22
B1689	1.689	0.21
B7195	7.195	0.21
B1251	1.251	0.21
B2306	2.306	0.21
B0766	0.766	0.21
B1601	1.601	0.21
B1766	1.766	0.21
B4306	4.306	0.21
B4361	4.361	0.20
B4162	4.162	0.20
B1086	1.086	0.20
B0799	0.799	0.20
B0965	0.965	0.20
B5953	5.953	0.20
B7625	7.625	0.19
B5614	5.614	0.19
B8054	8.054	0.19
B2678	2.678	0.19
B246	2.46	0.19
B2931	2.931	0.19
B1645	1.645	0.19
B7977	7.977	0.19
B102	1.02	0.18
B6151	6.151	0.18
B8173	8.173	0.18
B2295	2.295	0.18
B779	7.79	0.18
B1678	1.678	0.17
B0899	0.899	0.17
B7437	7.437	0.17
B8746	8.746	0.17
B7801	7.801	0.17
B5647	5.647	0.16
B5316	5.316	0.16
B3317	3.317	0.16
B5746	5.746	0.16
B8382	8.382	0.16
B514	5.14	0.16
B324	3.24	0.16
B5801	5.801	0.16
B424	4.24	0.16
B5162	5.162	0.16
B7591	7.591	0.15
B4251	4.251	0.15
B1623	1.623	0.15
B2832	2.832	0.15
B8878	8.878	0.15
B2009	2.009	0.15
B2733	2.733	0.15
B6515	6.515	0.15
B1513	1.513	0.15
B0888	0.888	0.15
B5735	5.735	0.14
B7107	7.107	0.14
B2031	2.031	0.14
B1987	1.987	0.14
B1295	1.295	0.14
B6272	6.272	0.14
B6812	6.812	0.14
B668	6.68	0.14
B5823	5.823	0.14
B4262	4.262	0.14
B5151	5.151	0.14
B7052	7.052	0.14
B7569	7.569	0.14
B6999	6.999	0.14
B7032	7.032	0.14
B8955	8.955	0.14
B1502	1.502	0.14
B6008	6.008	0.14
B2843	2.843	0.14
B5942	5.942	0.14
B8922	8.922	0.14
B8889	8.889	0.14
B89	8.9	0.14
B5658	5.658	0.13
B8911	8.911	0.13
B3678	3.678	0.13
B5526	5.526	0.13
B1976	1.976	0.13
B6548	6.548	0.13
B701	7.01	0.13
B113	1.13	0.13
B6426	6.426	0.13
B7151	7.151	0.13
B8228	8.228	0.13
B1262	1.262	0.13
B6559	6.559	0.13
B5724	5.724	0.13
B79	7.9	0.13
B1317	1.317	0.13
B7702	7.702	0.13
B6658	6.658	0.13
B6493	6.493	0.12
B6448	6.448	0.12
B8294	8.294	0.12
B8142	8.142	0.12
B1998	1.998	0.12
B7063	7.063	0.12
B5691	5.691	0.12
B812	8.12	0.12
B6988	6.988	0.12
B8679	8.679	0.12
B8834	8.834	0.12
B679	6.79	0.12
B5338	5.338	0.12
B2854	2.854	0.12
B1612	1.612	0.12
B5702	5.702	0.12
B8768	8.768	0.12
B6801	6.801	0.12
B7669	7.669	0.12
B7823	7.823	0.12
B69	6.9	0.12
B1953	1.953	0.12
B657	6.57	0.12
B7636	7.636	0.12
B8823	8.823	0.12
B6537	6.537	0.12
B8812	8.812	0.12
B2634	2.634	0.12
B6074	6.074	0.12
B6702	6.702	0.12
B2273	2.273	0.12
B259	2.59	0.11
B0689	0.689	0.11
B8087	8.087	0.11
B0579	0.579	0.11
B869	8.69	0.11
B5548	5.548	0.11
B6757	6.757	0.11
B8448	8.448	0.11
B2251	2.251	0.11
B8995	8.995	0.11
B8327	8.327	0.11
B7042	7.042	0.11
B8668	8.668	0.11
B7779	7.779	0.11
B7691	7.691	0.11
B0733	0.733	0.11
B6404	6.404	0.11
B2064	2.064	0.11
B7768	7.768	0.11
B603	6.03	0.11
B6713	6.713	0.11
B7021	7.021	0.11
B879	8.79	0.10
B8426	8.426	0.10
B6625	6.625	0.10
B2799	2.799	0.10
B1711	1.711	0.10
B0557	0.557	0.10
B1557	1.557	0.10
B7812	7.812	0.10
B6482	6.482	0.10
B6768	6.768	0.10
B7647	7.647	0.10
B7834	7.834	0.10
B7448	7.448	0.10
B2876	2.876	0.10
B7735	7.735	0.10
B6415	6.415	0.10
B0535	0.535	0.10
B7272	7.272	0.10
B5195	5.195	0.09
B8757	8.757	0.09
B0998	0.998	0.09
B7525	7.525	0.09
B8845	8.845	0.09
B6823	6.823	0.09
B7746	7.746	0.09
B4481	4.481	0.09
B8316	8.316	0.09
B0524	0.524	0.09
B6504	6.504	0.09
B6437	6.437	0.09
B1579	1.579	0.09
B6283	6.283	0.09
B8986	8.986	0.09
B6647	6.647	0.09
B6724	6.724	0.09
B3218	3.218	0.09
B8305	8.305	0.09
B6459	6.459	0.09
B1832	1.832	0.09
B0546	0.546	0.09
B6922	6.922	0.09
B3063	3.063	0.09
B7382	7.382	0.09
B1119	1.119	0.09
B2579	2.579	0.09
B2317	2.317	0.09
B6944	6.944	0.09
B7393	7.393	0.09
B6614	6.614	0.09
B5515	5.515	0.09
B7426	7.426	0.09
B6669	6.669	0.09
B059	0.59	0.09
B7724	7.724	0.09
B5118	5.118	0.09
B568	5.68	0.08
B0513	0.513	0.08
B5361	5.361	0.08
B1075	1.075	0.08
B6581	6.581	0.08
B8393	8.393	0.08
B8646	8.646	0.08
B7074	7.074	0.08
B6349	6.349	0.08
B6779	6.779	0.08
B27	2.7	0.08
B7867	7.867	0.08
B0788	0.788	0.08
B7658	7.658	0.08
B6294	6.294	0.08
B6217	6.217	0.08
B5349	5.349	0.08
B5779	5.779	0.08
B2328	2.328	0.08
B8779	8.779	0.08
B8657	8.657	0.08
B5129	5.129	0.08
B5537	5.537	0.08
B0612	0.612	0.08
B546	5.46	0.08
B6636	6.636	0.08
B8867	8.867	0.08
B4427	4.427	0.07
B6162	6.162	0.07
B0601	0.601	0.07
B5845	5.845	0.07
B7845	7.845	0.07
B7514	7.514	0.07
B647	6.47	0.07
B8371	8.371	0.07
B8459	8.459	0.07
B2942	2.942	0.07
B5812	5.812	0.07
B6052	6.052	0.07
B7217	7.217	0.07
B0645	0.645	0.07
B0954	0.954	0.07
B6393	6.393	0.07
B8043	8.043	0.07
B6878	6.878	0.07
B6338	6.338	0.07
B5768	5.768	0.07
B6845	6.845	0.07
B202	2.02	0.07
B5713	5.713	0.07
B0755	0.755	0.07
B6206	6.206	0.07
B768	7.68	0.07
B6327	6.327	0.07
B858	8.58	0.07
B5493	5.493	0.07
B5559	5.559	0.07
B8195	8.195	0.06
B8856	8.856	0.06
B5625	5.625	0.06
B6834	6.834	0.06
B8206	8.206	0.06
B6746	6.746	0.06
B8131	8.131	0.06
B5889	5.889	0.06
B758	7.58	0.06
B6735	6.735	0.06
B7261	7.261	0.06
B6867	6.867	0.06
B5757	5.757	0.06
B6261	6.261	0.06
B8349	8.349	0.06
B6239	6.239	0.06
B7459	7.459	0.06
B2711	2.711	0.06
B747	7.47	0.06
B6955	6.955	0.06
B8109	8.109	0.06
B0504	0.504	0.06
B8481	8.481	0.06
B0568	0.568	0.06
B1524	1.524	0.05
B6063	6.063	0.05
B636	6.36	0.05
B2722	2.722	0.05
B0634	0.634	0.05
B8404	8.404	0.05
B1667	1.667	0.05
B0623	0.623	0.05
B8624	8.624	0.05
B7294	7.294	0.05
B8514	8.514	0.05
B6933	6.933	0.05
B8602	8.602	0.05
B8217	8.217	0.05
B5581	5.581	0.05
B7933	7.933	0.05
B7999	7.999	0.05
B6691	6.691	0.05
B847	8.47	0.05
B4284	4.284	0.05
B181	1.81	0.05
B8163	8.163	0.05
B6889	6.889	0.05
B8635	8.635	0.05
B6041	6.041	0.05
B579	5.79	0.05
B7349	7.349	0.04
B7118	7.118	0.04
B8536	8.536	0.04
B3449	3.449	0.04
B8801	8.801	0.04
B6382	6.382	0.04
B6603	6.603	0.04
B625	6.25	0.04
B1404	1.404	0.04
B736	7.36	0.04
B7305	7.305	0.04
B6977	6.977	0.04
B5636	5.636	0.04
B7713	7.713	0.04
B1568	1.568	0.04
B6592	6.592	0.04
B5878	5.878	0.04
B8032	8.032	0.04
B1634	1.634	0.04
B8701	8.701	0.04
B725	7.25	0.04
B5964	5.964	0.04
B2788	2.788	0.04
B2909	2.909	0.04
B6118	6.118	0.04
B7096	7.096	0.03
B714	7.14	0.03
B4206	4.206	0.03
B8492	8.492	0.03
B7404	7.404	0.03
B7757	7.757	0.03
B1064	1.064	0.03
B7911	7.911	0.03
B59	5.9	0.03
B7481	7.481	0.03
B5305	5.305	0.03
B7922	7.922	0.03
B2953	2.953	0.03
B4217	4.217	0.03
B8098	8.098	0.03
B7856	7.856	0.03
B4052	4.052	0.03
B2821	2.821	0.03
B8613	8.613	0.03
B7184	7.184	0.03
B7536	7.536	0.03
B1656	1.656	0.03
B3196	3.196	0.03
B1009	1.009	0.03
B6316	6.316	0.03
B1821	1.821	0.03
B0987	0.987	0.03
B5856	5.856	0.03
B6371	6.371	0.03
B7371	7.371	0.02
B6305	6.305	0.02
B5592	5.592	0.02
B7988	7.988	0.02
B7316	7.316	0.02
B8976	8.976	0.02
B2262	2.262	0.02
B2229	2.229	0.02
B1887	1.887	0.02
B1535	1.535	0.02
B4372	4.372	0.02
B224	2.24	0.02
B7129	7.129	0.02
B8437	8.437	0.02
B801	8.01	0.02
B5482	5.482	0.02
B6195	6.195	0.02
B7415	7.415	0.02
B8338	8.338	0.02
B6966	6.966	0.02
B7085	7.085	0.02
B081	0.81	0.02
B4405	4.405	0.02
B1306	1.306	0.02
B7239	7.239	0.02
B8021	8.021	0.02
B0866	0.866	0.02
B0832	0.832	0.02
B5261	5.261	0.02
B8933	8.933	0.02
B5867	5.867	0.02
B557	5.57	0.02
B5184	5.184	0.02
B5669	5.669	0.02
B2623	2.623	0.01
B7503	7.503	0.01
B2766	2.766	0.01
B2755	2.755	0.01
B5173	5.173	0.01
B1458	1.458	0.01
B7492	7.492	0.01
B6019	6.019	0.01
B6173	6.173	0.01
B6856	6.856	0.01
B1964	1.964	0.01
B292	2.92	0.01
B4416	4.416	0.01
B8503	8.503	0.01
B0656	0.656	0.01
B0777	0.777	0.01
B5834	5.834	0.01
B2777	2.777	0.01
B8153	8.153	0.01
B2284	2.284	0.01
B6184	6.184	<0.01
B8415	8.415	<0.01
B8569	8.569	<0.01
B446	4.46	<0.01
B6911	6.911	<0.01
B6228	6.228	<0.01
B0877	0.877	<0.01
B2612	2.612	<0.01
B0722	0.722	<0.01
B7283	7.283	<0.01
B281	2.81	<0.01
B0843	0.843	<0.01
B5383	5.383	<0.01
B1469	1.469	<0.01
B8525	8.525	<0.01
B7228	7.228	<0.01
B0821	0.821	<0.01
